# Supplementary material for: Fabrication of bio-inspired metal-based superhydrophilic and underwater superoleophobic porous materials by hydrothermal treatment and magnetron sputtering
Source: Royal Society of Chemistry journal article supplement (doi:10.1039/d2ra07113d), 2023-01-01
Supplement: d2ra07113d1.pdf [file d2ra07113d1.pdf]

Electronic Supplementary Material (ESI) for Journal of RSC Advances. This journal is © The Royal Society of Chemistry 2022

**Supplementary Material for Journal of RSC Advances. This journal is © The Royal Society of Chemistry**

---

## **Fabrication of bio-inspired metal-based superhydrophilic and underwater superoleophobic porous materials by hydrothermal treatment and magnetron sputtering**

Adham Hussein Abdullah Farea AL-AKHALI,<sup>a</sup> Zhengqiang TANG<sup>a,\*</sup>

<sup>a</sup>School of Mechanical Engineering, Guizhou University, Guiyang 550025, PR China.

\*Corresponding author: Name: Zhengqiang TANG, Email: [zhengqiangtang@126.com](mailto:zhengqiangtang@126.com)

(Including Movie S1~S9)

**Please refer to the following link for all the videos:**

[RSC Advances . Electronic supplementary information \(ESI\) Videos - YouTube](#)

<https://www.youtube.com/playlist?list=PLFpPQ0QJhgRsyP9ryCPi2IDAz4XKBvs->
