# Supplementary material for: Fabrication of bio-inspired metal-based superhydrophilic and underwater superoleophobic porous materials by hydrothermal treatment and magnetron sputtering
Source: Royal Society of Chemistry journal article supplement (doi:10.1039/d2ra07113d), 2023-01-01
Supplement: d2ra07113d2.pdf [file d2ra07113d2.pdf]

**Supplementary Material for Journal of RSC Advances. This journal is © The Royal Society of Chemistry**

**Fabrication of bio-inspired metal-based superhydrophilic and underwater superoleophobic porous materials by hydrothermal treatment and magnetron sputtering**

Adham Hussein Abdullah Farea AL-AKHALI,<sup>a</sup> Zhengqiang TANG<sup>a,\*</sup>

<sup>a</sup>School of Mechanical Engineering, Guizhou University, Guiyang 550025, PR China.

\*Corresponding author: Name: Zhengqiang TANG, Email: [zhengqiangtang@126.com](mailto:zhengqiangtang@126.com)

(Including Figure S1~S5 and Table S1, and Movie S1~S9 in the Supporting Information)

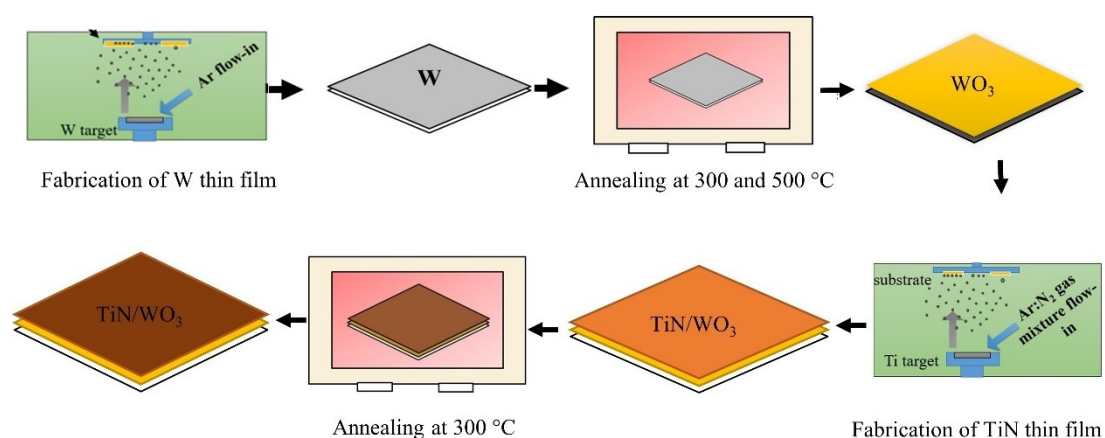

**Figure S1.** Schematic diagram of the fabrication procedure of the thin TiO<sub>2-x</sub>N<sub>x</sub>/WO<sub>3</sub> film.

**Table S1.** The atomic percentages of C, N, O, Ti, and W in the TiN and TiN300 films.

| Element | Atomic % |        |
|---------|----------|--------|
|         | TiN      | TiN300 |
| C1s     | 33.55    | 30.4   |
| N1s     | 18.08    | 6.98   |
| O1s     | 27.56    | 41.35  |
| Ti2p    | 19.3     | 19.91  |
| W4f     | 1.51     | 1.36   |

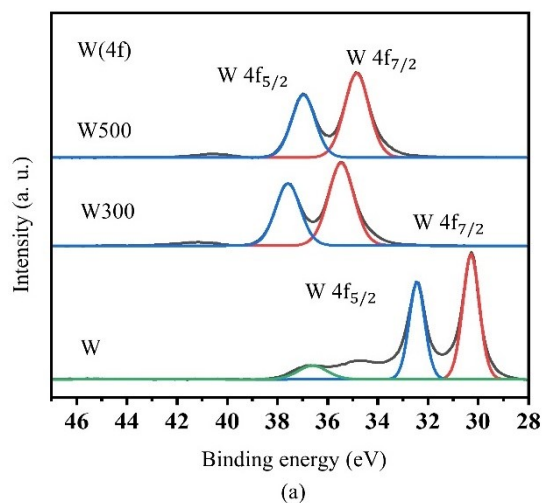

Figure S2. XPS of the prepared thin W film before and after annealing at 300 and 500 °C.

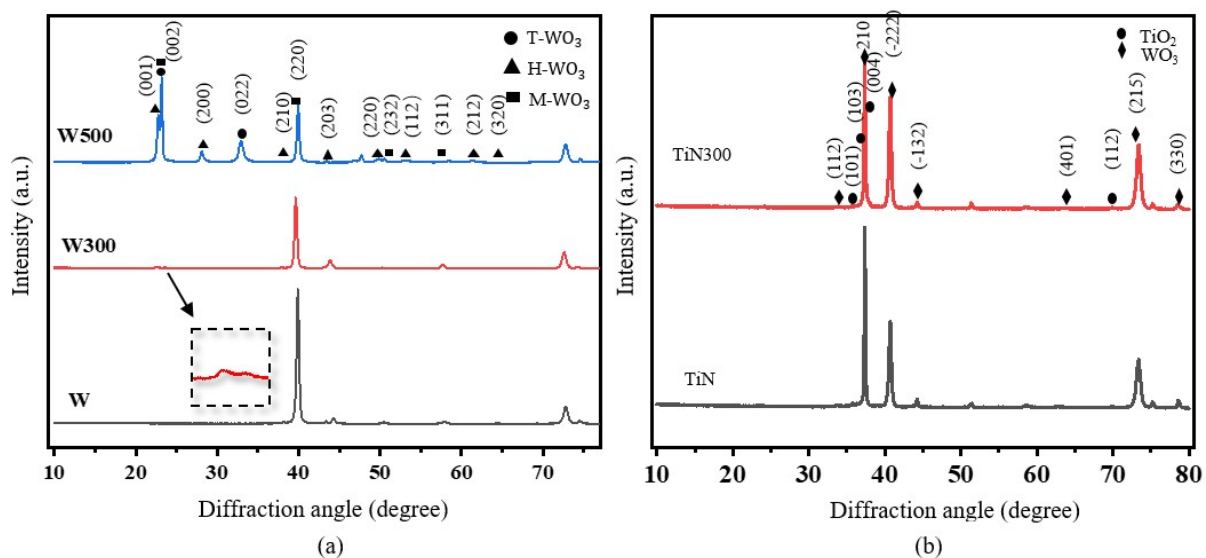

Figure S3. XRD patterns of (a) W film at different annealing temperatures, (b) TiN/WO<sub>3</sub> film at different annealing temperatures. Where (T-WO<sub>3</sub>), (H-WO<sub>3</sub>), and (M-WO<sub>3</sub>) represent the triclinic, hexagonal, and monoclinic structures of W.

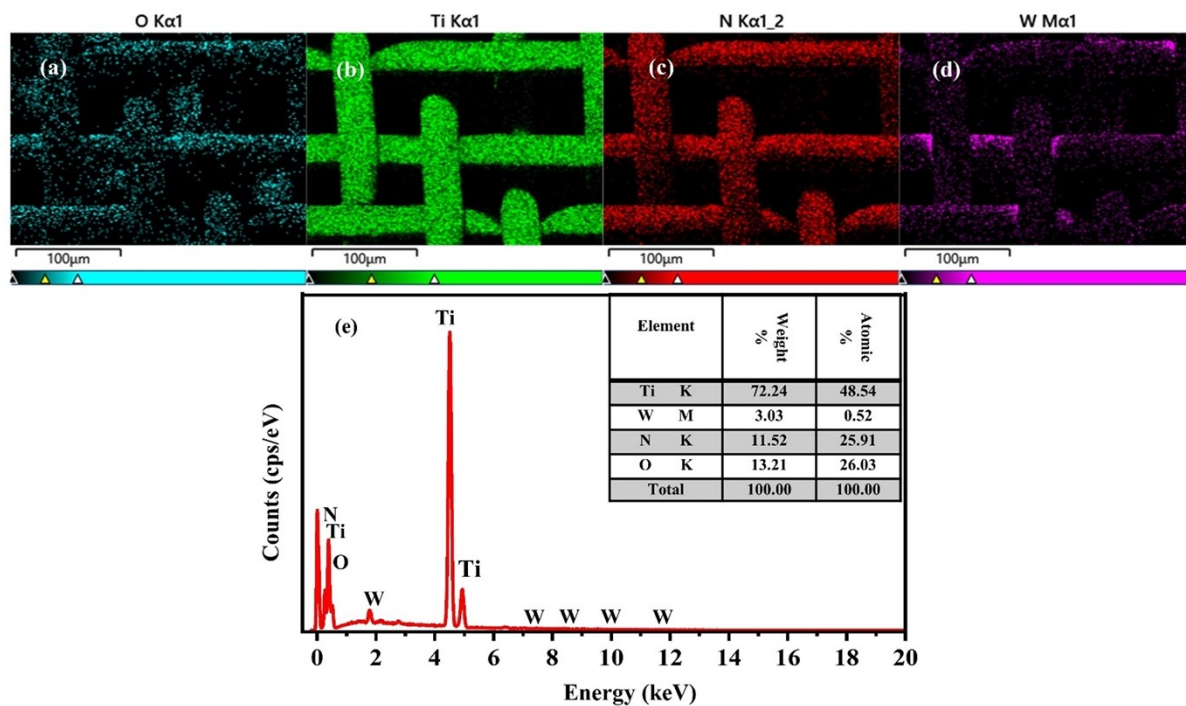

Figure S4. EDS of the TiN/WO<sub>3</sub> film coated a stainless steel mesh and annealed at 300 °C.

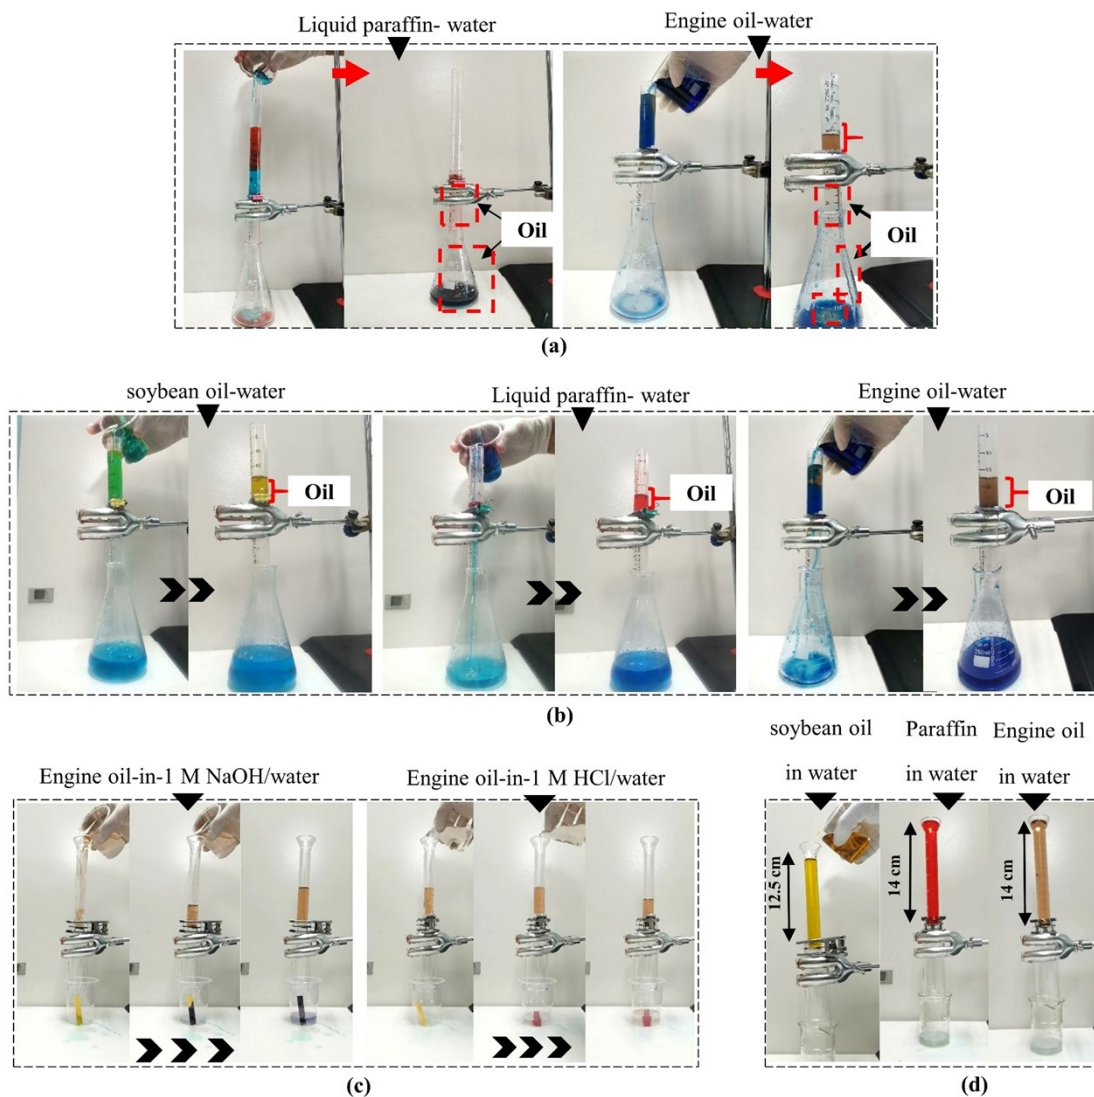

**Figure S5.** Oil-in-water separation test using (a) unprocessed SSMs, (b) modified SSMs, (c) modified SSMs for oil-in-water with corrosive agents, and (d) is the max high of accumulated oil on the modified SSMs.
